# Supplementary material for: Nuclear localization of Zika virus NS5 contributes to suppression of type I interferon production and response
Source: PubMed Central journal article supplement — J Gen Virol. 2019 Dec 20;102(3):001376. doi: 10.1099/jgv.0.001376 (PMC8515865; doi:10.1099/jgv.0.001376), 2019-12-20

1 **Fig. S1. Sequence alignment of flaviviruses NS5.**

2 Sequence variation of residues 370–406 (A) and 886–903 (B) of ZIKV and representative  
 3 flaviviruses NS5. Arrows indicate key motifs mentioned above. The alignment was performed  
 4 using Clustal X. The virus sequences and their GenBank accession numbers are as follows:  
 5 ZIKV-MR766 (AY632535.2), ZIKV H/PF/2013 (KJ776791.2), ZIKV-SZ01 (KU866423.2),  
 6 DENV-2 (AES93110.1), JEV (AOT85941), TBEV (KJ755186.1), WNV (JN183897.1), and  
 7 YFV (AAV34248.1).

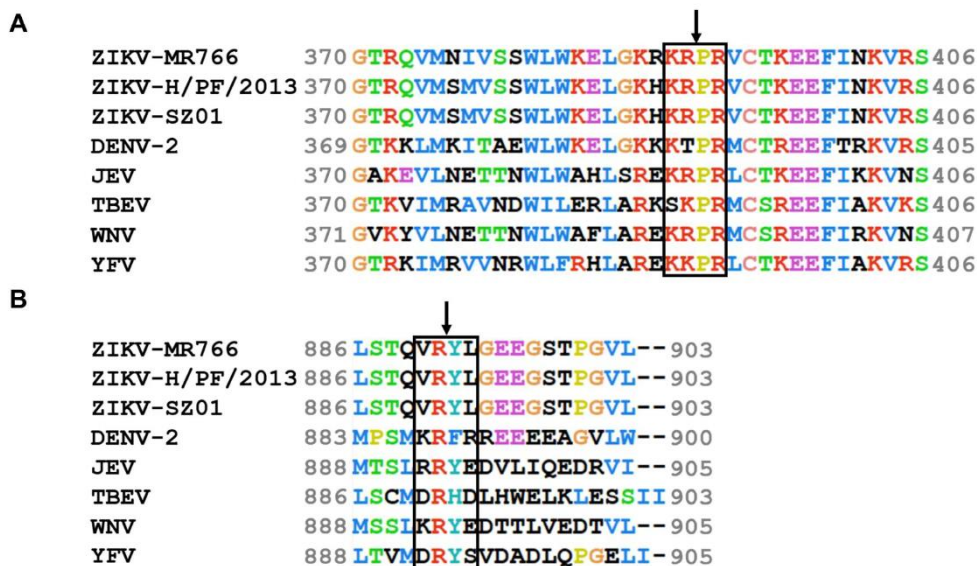

Supplement: jgv-102-1376-s001.pdf [file jgv-102-1376-s001.pdf]
